# Supplementary material for: Host proteostasis modulates influenza evolution
Source: PubMed Central journal article supplement (PMC5614556; doi:10.7554/elife.28652), 2017-09-26
Supplement: elife-28652-fig4-data1.pdf [file elife-28652-fig4-data1.pdf]

**Figure 4—source data 1.** List of ten highest % frequency non-synonymous mutations for each proteostasis environment and passage.

| <b>HSF1-Activated</b>  |           |                  |           |                   |           |                   |            |                   |            |
|------------------------|-----------|------------------|-----------|-------------------|-----------|-------------------|------------|-------------------|------------|
| <b>Passage 2</b>       |           | <b>Passage 9</b> |           | <b>Passage 11</b> |           | <b>Passage 19</b> |            | <b>Passage 23</b> |            |
| Mutation               | Freq.     | Mutation         | Freq.     | Mutation          | Freq.     | Mutation          | Freq.      | Mutation          | Freq.      |
| <b>NS1 F150S</b>       | <b>41</b> | <b>HA N144T</b>  | <b>88</b> | <b>HA N144T</b>   | <b>98</b> | <b>HA M246I</b>   | <b>100</b> | <b>HA M246I</b>   | <b>100</b> |
| <b>HA N144T</b>        | <b>30</b> | <b>HA V242I</b>  | <b>87</b> | <b>HA V242I</b>   | <b>97</b> | <b>HA V242I</b>   | <b>100</b> | <b>HA V242I</b>   | <b>100</b> |
| <b>PA H452Q</b>        | <b>25</b> | <b>HA M246I</b>  | <b>86</b> | <b>HA M246I</b>   | <b>97</b> | <b>HA N144T</b>   | <b>100</b> | <b>HA N144T</b>   | <b>100</b> |
| <b>HA M246I</b>        | <b>24</b> | PB2 F14S         | 76        | <i>PB2 F14S</i>   | 96        | <b>PB2 F14S</b>   | <b>100</b> | <b>PB2 F14S</b>   | <b>100</b> |
| <b>HA N262K</b>        | <b>17</b> | <b>NS1 F150S</b> | <b>37</b> | <b>PA H452Q</b>   | <b>26</b> | <b>NP G384R</b>   | <b>94</b>  | <i>NP G384R</i>   | 100        |
| <b>HA V242I</b>        | <b>11</b> | <b>PA H452Q</b>  | <b>34</b> | <b>NS1 F150S</b>  | <b>26</b> | NP D101G          | 55         | NP D101G          | 91         |
| <i>HA N142K</i>        | 4         | PA V44A          | 16        | <i>NP G384R</i>   | 23        | M1 K174R          | 43         | M1 K174R          | 89         |
| <i>HA E402G</i>        | 4         | <i>NP G384R</i>  | 13        | PB1 Y49*          | 15        | PB1 I517V         | 41         | PB1 Y49*          | 64         |
| NS1 R37G               | 3         | PB2 E2K          | 12        | PA V44A           | 15        | PB1 Y49*          | 33         | PB1 I517V         | 60         |
| NS1 N127T              | 2         | <b>PB1 E697K</b> | <b>10</b> | NP D480N          | 11        | PB1 H456N         | 26         | PA E604G          | 26         |
| <b>Baseline</b>        |           |                  |           |                   |           |                   |            |                   |            |
| <b>Passage 2</b>       |           | <b>Passage 9</b> |           | <b>Passage 11</b> |           | <b>Passage 19</b> |            | <b>Passage 23</b> |            |
| Mutation               | Freq.     | Mutation         | Freq.     | Mutation          | Freq.     | Mutation          | Freq.      | Mutation          | Freq.      |
| <b>NS1 F150S</b>       | <b>36</b> | <b>HA N144T</b>  | <b>73</b> | <b>HA N144T</b>   | <b>78</b> | <b>HA V242I</b>   | <b>100</b> | <b>HA V242I</b>   | <b>100</b> |
| <b>PA H452Q</b>        | <b>34</b> | <b>HA V242I</b>  | <b>72</b> | <b>HA V242I</b>   | <b>78</b> | <b>HA M246I</b>   | <b>100</b> | <b>HA M246I</b>   | <b>100</b> |
| <b>HA N144T</b>        | <b>26</b> | <b>HA M246I</b>  | <b>72</b> | <b>HA M246I</b>   | <b>77</b> | <b>HA N144T</b>   | <b>100</b> | <b>PB2 F14S</b>   | <b>100</b> |
| <b>HA M246I</b>        | <b>21</b> | <b>PA H452Q</b>  | <b>49</b> | <b>PA H452Q</b>   | <b>54</b> | <i>PB2 F14S</i>   | 100        | <b>HA N144T</b>   | <b>100</b> |
| <b>HA N262K</b>        | <b>20</b> | PB1 V660F        | 46        | PB1 V660F         | 51        | NP D101N          | 80         | NP G384R          | 94         |
| <b>HA N142K</b>        | <b>7</b>  | PA N359T         | 22        | PA N359T          | 30        | HA I538T          | 78         | PA M12I           | 93         |
| NS1 R118K              | 6         | <b>NS1 F150S</b> | <b>17</b> | NP D101N          | 26        | PA M12I           | 63         | NP D101N          | 88         |
| PB1-F2 R21K            | 4         | <b>PB1 F700S</b> | <b>15</b> | PB2 F14S          | 22        | <i>PA H452Q</i>   | 60         | HA I538T          | 80         |
| HA G140D               | 4         | NP G384R         | 13        | NS1 R118K         | 22        | HA G349S          | 57         | PA E15K           | 64         |
| NP V100I               | 3         | NP D101N         | 13        | <b>PB1 F700S</b>  | <b>18</b> | NP G384R          | 54         | <i>PA H452Q</i>   | 63         |
| <b>Hsp90-Inhibited</b> |           |                  |           |                   |           |                   |            |                   |            |
| <b>Passage 2</b>       |           | <b>Passage 9</b> |           | <b>Passage 11</b> |           | <b>Passage 19</b> |            | <b>Passage 23</b> |            |
| Mutation               | Freq.     | Mutation         | Freq.     | Mutation          | Freq.     | Mutation          | Freq.      | Mutation          | Freq.      |
| <b>HA N144T</b>        | <b>32</b> | <i>HA N144T</i>  | 53        | <i>HA N144T</i>   | 70        | <i>HA M246I</i>   | 100        | HA M246I          | 100        |
| <b>PA H452Q</b>        | <b>28</b> | HA V242I         | 49        | <i>HA V242I</i>   | 69        | <i>HA V242I</i>   | 100        | HA N144T          | 100        |
| <b>NS1 F150S</b>       | <b>25</b> | <i>HA M246I</i>  | 48        | <i>HA M246I</i>   | 68        | <i>HA N144T</i>   | 100        | HA V242I          | 100        |
| <b>HA M246I</b>        | <b>19</b> | <b>PA H452Q</b>  | <b>41</b> | <b>PA H452Q</b>   | <b>46</b> | HA A492V          | 99         | <i>M1 K174R</i>   | 100        |
| <b>HA N262K</b>        | <b>18</b> | NP N319K         | 28        | NP N319K          | 39        | HA Y249H          | 98         | HA Y249H          | 99         |
| <b>HA N142K</b>        | <b>12</b> | NS1 R118K        | 18        | HA Y249H          | 35        | <i>PB2 F14S</i>   | 95         | HA A492V          | 99         |

|                        |   |                        |    |                        |    |                 |           |                 |           |
|------------------------|---|------------------------|----|------------------------|----|-----------------|-----------|-----------------|-----------|
| NS1 I182T;<br>NEP S27P | 9 | NS1 I182T; NEP<br>S27P | 18 | NS1 R118K              | 26 | M1 K174R        | 86        | <i>PB2 F14S</i> | 98        |
| NS1 R118K              | 9 | HA Y249H               | 15 | NS1 I182T; NEP<br>S27P | 26 | <i>NP N319K</i> | 81        | <i>NP N319K</i> | 96        |
| <i>HA E402G</i>        | 5 | PA D3Y                 | 11 | HA A492V               | 19 | <b>PA H452Q</b> | <b>71</b> | <b>PA H452Q</b> | <b>93</b> |
| M2 A30T                | 4 | NS1/NEP V6L            | 11 | NS1/NEP V6L            | 17 | <i>M1 T239A</i> | 61        | HA R241G        | 83        |

\*Bolted mutations were observed in 3/3 biological replicates; italicized mutations were observed in 2/3 biological replicates; codon number is in parentheses.
