# Supplementary material for: Host proteostasis modulates influenza evolution
Source: PubMed Central journal article supplement (PMC5614556; doi:10.7554/elife.28652), 2017-09-26
Supplement: elife-28652-fig4-data2.pdf [file elife-28652-fig4-data2.pdf]

**Figure 4—source data 2.** List of ten highest % frequency synonymous mutations for each proteostasis environment and passage.

| <b>HSF1-Activated</b>        |           |                              |           |                              |           |                              |           |                                |           |
|------------------------------|-----------|------------------------------|-----------|------------------------------|-----------|------------------------------|-----------|--------------------------------|-----------|
| <b>Passage 2</b>             |           | <b>Passage 9</b>             |           | <b>Passage 11</b>            |           | <b>Passage 19</b>            |           | <b>Passage 23</b>              |           |
| Mutation                     | Freq.     | Mutation                     | Freq.     | Mutation                     | Freq.     | Mutation                     | Freq.     | Mutation                       | Freq.     |
| <b>6555 A/G (Intergenic)</b> | <b>42</b> | <b>6555 A/G (Intergenic)</b> | <b>42</b> | <b>6555 A/G (Intergenic)</b> | <b>43</b> | 7689 ggT/ggC (PA 371)        | 78        | 6414 aaA/aaG (NP 452)          | 92        |
| 962 atC/atT (HA 316)         | 8         | 5202 aaA/aaG (NP 48)         | 13        | 5202 aaA/aaG (NP 48)         | 18        | 6414 aaA/aaG (NP 452)        | 60        | 7689 ggT/ggC (PA 371)          | 83        |
| 4905 caC/caT (NEP 87)        | 5         | 1922 ttG/ttA (M1 60)         | 10        | 7770 ccT/ccG (PA 398)        | 16        | <b>6555 A/G (Intergenic)</b> | <b>43</b> | <b>6555 A/G (Intergenic)</b>   | <b>42</b> |
| 7647 acT/acA (PA 357)        | 2         | 2586 taT/taC (M2 52)         | 10        | 1922 ttG/ttA (M1 60)         | 15        | 1238 ttC/ttT (HA 408)        | 35        | 1238 ttC/ttT (HA 408)          | 30        |
| 5109 ggG/ggA (NP 17)         | 2         | <b>6687 gcA/gcG (PA 37)</b>  | <b>10</b> | 2586 taT/taC (M2 52)         | 14        | 2586 taT/taC (M2 52)         | 34        | <b>10867 ttT/ttC (PB1 700)</b> | <b>20</b> |
| 8607 gaA/gaG (PA 677)        | 2         | 2411 ccT/ccC (M1 223)        | 9         | <b>6687 gcA/gcG (PA 37)</b>  | <b>13</b> | 9292 gaT/gaC (PB1 175)       | 34        | 9292 gaT/gaC (PB1 175)         | 20        |
| 9131 Cta/Tta (PB1 122)       | 2         | 962 atC/atT (HA 316)         | 7         | 7689 ggT/ggC (PA 371)        | 12        | 9229 ggT/ggC (PB1 154)       | 19        | 11135 gaG/gaA (PB2 18)         | 18        |
| 10249 agC/agT (PB1 494)      | 2         | 7869 gaC/gaT (PA 431)        | 7         | 8721 ttA/ttG (PA 715)        | 11        | 5202 aaA/aaG (NP 48)         | 16        | 6696 acT/acA (PA 40)           | 17        |
|                              |           | 8166 ccG/ccA (PA 530)        | 7         | 4223 ctT/ctC (NS1 82)        | 10        | 7980 gcC/gcT (PA 468)        | 12        | 9229 ggT/ggC (PB1 154)         | 17        |
|                              |           | 7689 ggT/ggC (PA 371)        | 6         | 7869 gaC/gaT (PA 431)        | 9         | 4223 ctT/ctC (NS1 82)        | 11        | 8529 gcA/gcC (PA 651)          | 10        |
| <b>Baseline</b>              |           |                              |           |                              |           |                              |           |                                |           |
| <b>Passage 2</b>             |           | <b>Passage 9</b>             |           | <b>Passage 11</b>            |           | <b>Passage 19</b>            |           | <b>Passage 23</b>              |           |
| Mutation                     | Freq.     | Mutation                     | Freq.     | Mutation                     | Freq.     | Mutation                     | Freq.     | Mutation                       | Freq.     |
| <b>6555 A/G (Intergenic)</b> | <b>43</b> | <b>6555 A/G (Intergenic)</b> | <b>43</b> | <b>6555 A/G (Intergenic)</b> | <b>43</b> | 2586 taT/taC (M2 52)         | 67        | 11135 gaG/gaA (PB2 18)         | 95        |
| 4905 caC/caT (NEP 87)        | 14        | 10960 gaG/gaA (PB1 731)      | 25        | 11135 gaG/gaA (PB2 18)       | 34        | 11135 gaG/gaA (PB2 18)       | 63        | 2586 taT/taC (M2 52)           | 68        |
| 4346 gcA/gcG (NS1 56)        | 11        | 4905 caC/caT (NEP 87)        | 20        | 4905 caC/caT (NEP 87)        | 24        | 2093 ctC/ctA (M1 117)        | 60        | 2093 ctC/ctA (M1 117)          | 63        |
| 8217 gaT/gaC (PA 547)        | 5         | 4346 gcA/gcG (NS1 56)        | 16        | 4346 gcA/gcG (NS1 56)        | 20        | <b>6555 A/G (Intergenic)</b> | <b>44</b> | <b>6555 A/G (Intergenic)</b>   | <b>43</b> |
| 6207 agC/agT (NP 383)        | 4         | 11109 Ctg/Ttg (PB2 10)       | 14        | 10960 gaG/gaA (PB1 731)      | 20        | 10444 taT/taC (PB1 559)      | 21        | 10444 taT/taC (PB1 559)        | 42        |
| 10024 ttA/ttG (PB1 414)      | 2         | 6045 gtG/gtA (NP 329)        | 12        | 2586 taT/taC (M2 52)         | 16        | 2605 Ctg/Ttg (M2 59)         | 20        | 5175 ttC/ttT (NP 39)           | 26        |
| 4409 ctT/ctC (NS1 77)        | 2         | 6207 agC/agT (NP 383)        | 9         | 8013 gaT/gaC (PA 479)        | 12        | 4905 caC/caT (NEP 87)        | 18        | 4905 caC/caT (NEP 87)          | 23        |
| 779 ccG/ccA (HA 255)         | 2         | 8013 gaT/gaC (PA 479)        | 8         | 11109 Ctg/Ttg (PB2 10)       | 11        | 4346 gcA/gcG (NS1 56)        | 15        | 6630 gaA/gaG (PA 18)           | 22        |
| <b>7647 acT/acA (PA 357)</b> | <b>2</b>  | 8217 gaT/gaC (PA 547)        | 8         | 8217 gaT/gaC (PA 547)        | 9         | 7662 aaA/aaG (PA 362)        | 13        | 4346 gcA/gcG (NS1 56)          | 21        |

|                                |           |                              |           |                              |           |                              |           |                              |           |
|--------------------------------|-----------|------------------------------|-----------|------------------------------|-----------|------------------------------|-----------|------------------------------|-----------|
| 10351 acA/acG (PB1 528)        | 2         | 425 acC/acT (HA 137)         | 7         | 2093 ctC/ctA (M1 117)        | 9         | 8685 aaT/aaC (PA 703)        | 13        | 2605 Ctg/Ttg (M2 59)         | 19        |
| <b>Hsp90-Inhibited</b>         |           |                              |           |                              |           |                              |           |                              |           |
| <b>Passage 2</b>               |           | <b>Passage 9</b>             |           | <b>Passage 11</b>            |           | <b>Passage 19</b>            |           | <b>Passage 23</b>            |           |
| Mutation                       | Freq.     | Mutation                     | Freq.     | Mutation                     | Freq.     | Mutation                     | Freq.     | Mutation                     | Freq.     |
| <b>6555 A/G (Intergenic)</b>   | <b>42</b> | <b>6555 A/G (Intergenic)</b> | <b>43</b> | <i>2616 ggG/ggA (M2 62)</i>  | <i>51</i> | 11135 gaG/gaA (PB2 18)       | 92        | 11135 gaG/gaA (PB2 18)       | 94        |
| <i>2616 ggG/ggA (M2 62)</i>    | 28        | <i>2616 ggG/ggA (M2 62)</i>  | 38        | <b>6555 A/G (Intergenic)</b> | <b>43</b> | <i>2586 taT/taC (M2 52)</i>  | 83        | 5592 gcT/gcC (NP 178)        | 93        |
| <i>2718 ctG/ctA (M2 96)</i>    | 4         | 2270 gaG/gaA (M1 176)        | 34        | 2270 gaG/gaA (M1 176)        | 37        | 2616 ggG/ggA (M2 62)         | 79        | 2616 ggG/ggA (M2 62)         | 90        |
| 2297 acG/acA (M1 185)          | 3         | 4905 caC/caT (NEP 87)        | 23        | 5592 gcT/gcC (NP 178)        | 24        | 5592 gcT/gcC (NP 178)        | 61        | 1001 acT/acC (HA 329)        | 58        |
| 4361 ggA/ggG (NS1 61)          | 2         | 5592 gcT/gcC (NP 178)        | 11        | 4905 caC/caT (NEP 87)        | 22        | 4905 caC/caT (NEP 87)        | 45        | 4905 caC/caT (NEP 87)        | 56        |
| 11135 gaG/gaA (PB2 18)         | 2         | 9220 agA/agG (PB1 151)       | 10        | <i>2586 taT/taC (M2 52)</i>  | 17        | <b>6555 A/G (Intergenic)</b> | <b>42</b> | 10309 gtG/gtA (PB1 514)      | 51        |
| 4905 caC/caT (NEP 87)          | 2         | <i>2586 taT/taC (M2 52)</i>  | 7         | 11135 gaG/gaA (PB2 18)       | 17        | 1001 acT/acC (HA 329)        | 36        | <i>2586 taT/taC (M2 52)</i>  | 44        |
| <i>7647 acT/acA (PA 357)</i>   | 2         | 5784 gtG/gtA (NP 242)        | 4         | 1694 atT/atC (HA 560)        | 9         | 2099 taT/taC (M1 119)        | 33        | 5214 taT/taC (NP 52)         | 43        |
| <b>10249 agC/agT (PB1 494)</b> | <b>2</b>  | 7902 agG/agA (PA 442)        | 3         | 9220 agA/agG (PB1 151)       | 7         | 5826 ctC/ctA (NP 256)        | 19        | <b>6555 A/G (Intergenic)</b> | <b>42</b> |
|                                |           | <i>7512 aaA/aaG (PA 312)</i> | 3         | <i>4436 gcT/gcA (NS1 86)</i> | 4         | 10309 gtG/gtA (PB1 514)      | 16        | 2099 taT/taC (M1 119)        | 22        |

\*Bolded mutations were observed in 3/3 biological replicates; italicized mutations were observed in 2/3 biological replicates. Top line of mutation description is the nucleotide number (of concatenated influenza genome) and codon mutation; bottom line contains the respective protein and codon number in parentheses. Empty cells indicate that less than ten variants were observed.
