# Supplementary material for: Host proteostasis modulates influenza evolution
Source: PubMed Central journal article supplement (PMC5614556; doi:10.7554/elife.28652), 2017-09-26
Supplement: elife-28652-fig5-data1.pdf [file elife-28652-fig5-data1.pdf]

**Figure 5—source data 1. Molecular dynamics simulations: Energy contributions**

| PA:PB1 Variant(s)                            | WT:WT       | W619R:WT    | P620A:WT    | P620T:WT    | P620S:WT    | E629K:WT    | WT:K11E     | WT:V12D     | E629K:K11E | E629K:V12D  |
|----------------------------------------------|-------------|-------------|-------------|-------------|-------------|-------------|-------------|-------------|------------|-------------|
| $E_{ele}$                                    | -183.7±15.1 | -219.9±16.8 | -269.7±16.2 | -150.8±10.2 | -304.0±18.0 | -201.1±15.7 | 158.2±23.7  | -155.9±12.3 | 29.9±8.0   | -85.6±11.2  |
| $E_{vdw}$                                    | -119.5±2.2  | -129.9±2.1  | -120.8±1.0  | -121.1±1.1  | -115.2±1.4  | -136.0±1.5  | -116.6±1.5  | -122.2±0.9  | -129.5±0.3 | -131.7±1.4  |
| $E_{int}$                                    | 0.0±0.0     | 0.0±0.0     | 0.0±0.0     | 0.0±0.0     | 0.0±0.0     | 0.0±0.0     | 0.0±0.0     | 0.0±0.0     | 0.0±0.0    | 0.0±0.0     |
| $E_{gas} = E_{ele} + E_{vdw} + E_{int}$      | -303.2±16.2 | -349.8±18.8 | -390.5±16.5 | -271.9±10.2 | -419.2±16.8 | -337.2±15.9 | 41.5±24.9   | -278.1±12.9 | -99.6±7.8  | -217.3±12.1 |
| $G_{sol-np}$                                 | -17.0±0.2   | -16.8±0.1   | -16.6±0.1   | -16.3±0.2   | -15.6±0.1   | -16.3±0.2   | -15.8±0.3   | -16.3±0.2   | -17.0±0.1  | -17.1±0.2   |
| $G_{sol-pol, GB}$                            | 204.5±16.6  | 255.3±17.6  | 291.8±15.5  | 179.3±9.7   | 321.9±17.5  | 243.7±15.7  | -116.5±22.2 | 186.4±13.7  | 3.3±8.6    | 122.6±10.9  |
| $G_{sol, GB} = G_{sol-np} + G_{sol-pol, GB}$ | 187.5±16.6  | 238.5±17.6  | 275.2±15.5  | 163.0±9.6   | 306.3±17.5  | 227.3±15.7  | -132.3±22.0 | 170.2±13.6  | -13.8±8.6  | 105.5±10.9  |
| $H_{total, GB} = E_{gas} + G_{sol, GB}$      | -115.7±1.8  | -111.3±1.8  | -115.3±1.5  | -109.0±1.6  | -112.9±1.6  | -109.9±1.2  | -90.8±3.4   | -107.9±1.2  | -113.4±2.8 | -111.7±2.0  |

\*Values given are the energy difference (in kcal/mol) of the Complex(PA<sub>C</sub>-PB1<sub>N</sub>) - PA<sub>C</sub> - PB1<sub>N</sub>.  $E_{ele}$ : Coulombic energy.  $E_{vdw}$ : van der Waals energy.  $E_{int}$ : internal energy.  $G_{sol-np}$ : nonpolar solvation free energy.  $G_{sol-pol, GB}$ : polar solvation free energy based on the GBSA method. Error given is the SEM. Energies highlighted in blue are more favorable than that of the wild-type complex; energies highlighted in red are less favorable than that of the wild-type complex.
